# Phylogenetic Analysis Detected Newly Identified Phylogroups in Uropathogenic *Escherichia coli* Isolates in Iraq

Hiba J. Hamza<sup>1</sup>, Huda H. Al-Hasnawy<sup>1</sup>, Layth Jasim Mohammad<sup>2</sup>, Mohammed R. Judi<sup>1</sup>, Hider M.H. Al-Shirifi<sup>1</sup>, Isaac Karimi<sup>3</sup>, and Nima Yakhchalian<sup>4\*</sup>

<sup>1</sup> Department of Microbiology, College of Medicine, Babylon University, Hilla City, Babylon Governorate, 51002, Iraq.

<sup>2</sup> Department of Pharmacology, College of Medicine, Babylon University, Hilla City, Babylon Governorate, 51002, Iraq.

<sup>3</sup> Laboratory for Computational Physiology; Department of Biology, Faculty of Science, Razi University 67149-67346, Kermanshah, Iran.

<sup>4</sup> Department of Biology, Faculty of Science, Razi University 67149-67346, Kermanshah, Iran.

\* **Corresponding Author:** Nima Yakhchalian, [Nimayakhchalian0@gmail.com](mailto:Nimayakhchalian0@gmail.com)

## Withdrawal statement

medRxiv has withdrawn this manuscript as it was submitted and made public without the full consent of all the authors. Therefore, this work should not be cited as reference for the project. If you have any questions, please contact the corresponding author.
